# Supplementary material for: Shaping particle size distribution of a metastable polymorph in additive-assisted reactive crystallization by the Taguchi method
Source: Royal Society of Chemistry journal article supplement (doi:10.1039/d2ce00355d), 2022-01-01
Supplement: d2ce00355d1.pdf [file d2ce00355d1.pdf]

**Electronic Supplementary Information (ESI)**

Shaping Particle Size Distribution of a Metastable Polymorph in  
Additive-assisted Reactive Crystallization by  
the Taguchi Method

Hung Lin Lee, Chia Ling Yang and Tu Lee\*

Department of Chemical and Materials Engineering, National Central University

300 Zhongda Road, Zhongli District, Taoyuan City 320317, Taiwan R.O.C.

---

\* Corresponding Author. Tel: +886-3-4227151 ext. 34204. Fax: +886-3-4252296.  
Email: [tulee@cc.ncu.edu.tw](mailto:tulee@cc.ncu.edu.tw)

**Table S1.** Form space of *L*-glutamic acid (*L*-GLU) at 25 °C.

|                                        | <i>n</i> -heptane | ethyl acetate | toluene | methyl <i>tert</i> -butyl ether (MTBE) | methyl ethyl ketone (MEK) | chloroform | tetrahydrofuran (THF) | <i>N,N</i> -dimethylaniline (DMA) | acetone | 1,4-dioxane | nitrobenzene | <i>n</i> -butyl alcohol | isopropyl alcohol | benzyl alcohol | acetonitrile | ethanol | dimethyl sulfoxide (DMSO) | methanol | water |
|----------------------------------------|-------------------|---------------|---------|----------------------------------------|---------------------------|------------|-----------------------|-----------------------------------|---------|-------------|--------------|-------------------------|-------------------|----------------|--------------|---------|---------------------------|----------|-------|
| good-cosolvent                         |                   |               |         |                                        |                           |            |                       |                                   |         |             |              |                         |                   |                |              |         |                           |          |       |
| bad-cosolvent                          |                   |               |         |                                        |                           |            |                       |                                   |         |             |              |                         |                   |                |              |         |                           |          |       |
| antisolvent                            |                   |               |         |                                        |                           |            |                       |                                   |         |             |              |                         |                   |                |              |         |                           |          |       |
| pure good-solvent                      |                   |               |         |                                        |                           |            |                       |                                   |         |             |              |                         |                   |                |              |         |                           |          |       |
| pure bad-solvent                       |                   |               |         |                                        |                           |            |                       |                                   |         |             |              |                         |                   |                |              |         |                           |          |       |
| immiscible pairs                       |                   |               |         |                                        |                           |            |                       |                                   |         |             |              |                         |                   |                |              |         |                           |          |       |
| <i>n</i> -heptane                      |                   |               |         |                                        |                           |            |                       |                                   |         |             |              |                         |                   |                |              |         |                           |          |       |
| ethyl acetate                          |                   |               |         |                                        |                           |            |                       |                                   |         |             |              |                         |                   |                |              |         |                           |          |       |
| toluene                                |                   |               |         |                                        |                           |            |                       |                                   |         |             |              |                         |                   |                |              |         |                           |          |       |
| methyl <i>tert</i> -butyl ether (MTBE) |                   |               |         |                                        |                           |            |                       |                                   |         |             |              |                         |                   |                |              |         |                           |          |       |
| methyl ethyl ketone (MEK)              |                   |               |         |                                        |                           |            |                       |                                   |         |             |              |                         |                   |                |              |         |                           |          |       |
| chloroform                             |                   |               |         |                                        |                           |            |                       |                                   |         |             |              |                         |                   |                |              |         |                           |          |       |
| tetrahydrofuran (THF)                  |                   |               |         |                                        |                           |            |                       |                                   |         |             |              |                         |                   |                |              |         |                           |          |       |
| <i>N,N</i> -dimethylaniline (DMA)      |                   |               |         |                                        |                           |            |                       |                                   |         |             |              |                         |                   |                |              |         |                           |          |       |
| acetone                                |                   |               |         |                                        |                           |            |                       |                                   |         |             |              |                         |                   |                |              |         |                           |          |       |
| 1,4-dioxane                            |                   |               |         |                                        |                           |            |                       |                                   |         |             |              |                         |                   |                |              |         |                           |          |       |
| nitrobenzene                           |                   |               |         |                                        |                           |            |                       |                                   |         |             |              |                         |                   |                |              |         |                           |          |       |
| <i>n</i> -butyl alcohol                |                   |               |         |                                        |                           |            |                       |                                   |         |             |              |                         |                   |                |              |         |                           |          |       |
| isopropyl alcohol                      |                   |               |         |                                        |                           |            |                       |                                   |         |             |              |                         |                   |                |              |         |                           |          |       |
| benzyl alcohol                         |                   |               |         |                                        |                           |            |                       |                                   |         |             |              |                         |                   |                |              |         |                           |          |       |
| acetonitrile                           |                   |               |         |                                        |                           |            |                       |                                   |         |             |              |                         |                   |                |              |         |                           |          |       |
| ethanol                                |                   |               |         |                                        |                           |            |                       |                                   |         |             |              |                         |                   |                |              |         |                           |          |       |
| dimethyl sulfoxide (DMSO)              |                   |               |         |                                        |                           |            |                       |                                   |         |             |              |                         |                   |                |              |         |                           |          |       |
| methanol                               |                   |               |         |                                        |                           |            |                       |                                   |         |             |              |                         |                   |                |              |         |                           |          |       |
| water                                  |                   |               |         |                                        |                           |            |                       |                                   |         |             |              |                         |                   |                |              |         |                           |          |       |

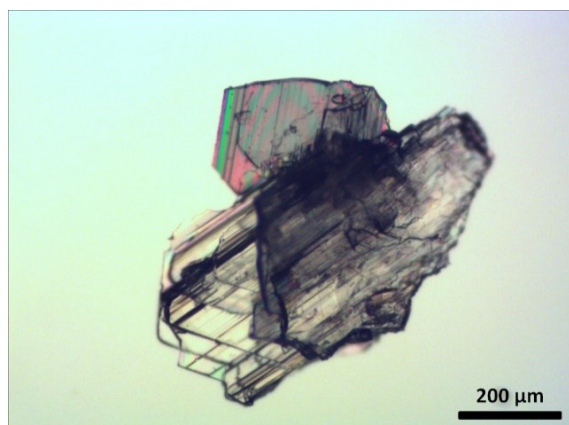

(a)

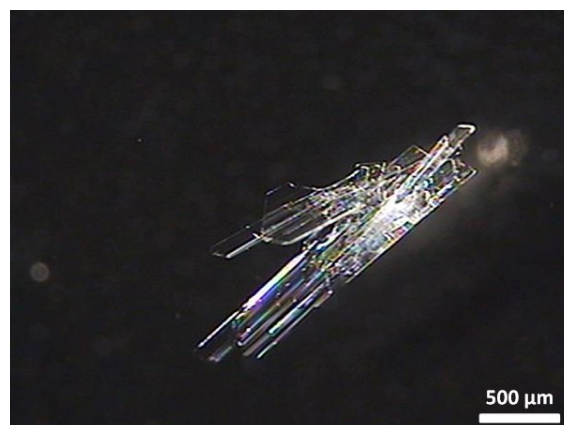

(b)

**Figure S1.** OM images of  $\beta$ -GLU crystals obtained by (a) rapid and (b) slow cooling.

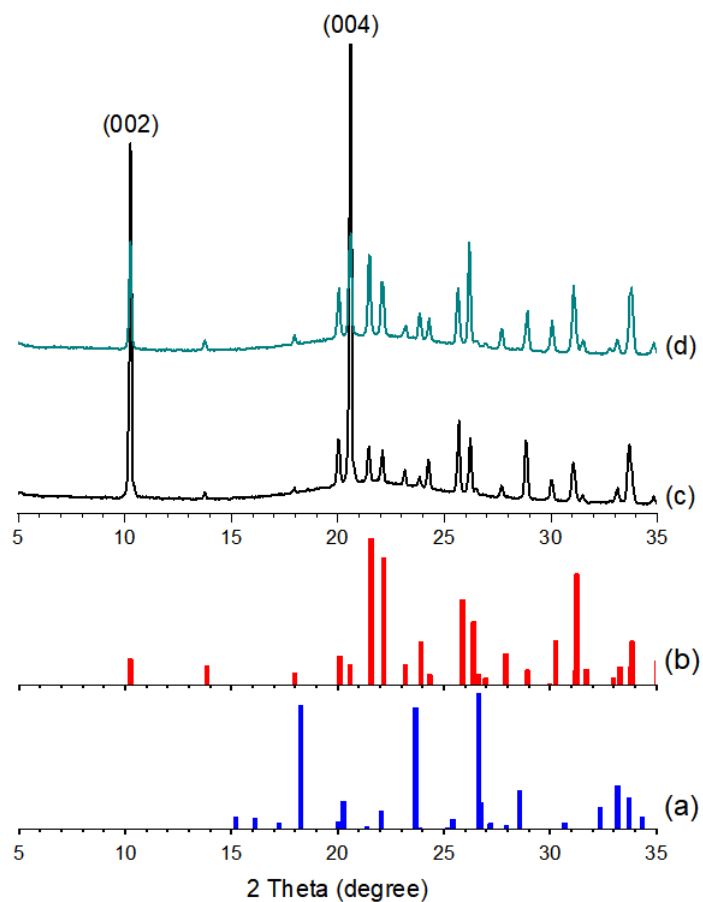

**Figure S2.** Theoretical patterns of (a)  $\alpha$ -GLU and (b)  $\beta$ -GLU acquired from the Cambridge Crystallographic Data Centre (CCDC) with CCDC codes: LGLUAC02 and LGLUAC01, respectively. PXRD patterns of (c-d)  $\beta$ -GLU crystals obtained by (c) rapid and (d) slow cooling.

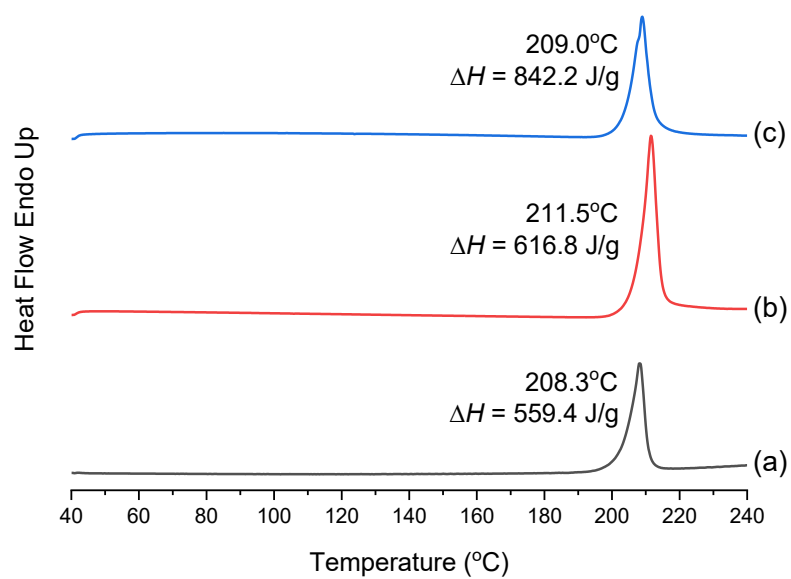

**Figure S3.** DSC scans of (a) purchased and (b-c) our prepared  $\beta$ -GLU crystals obtained by (b) rapid and (c) slow cooling.

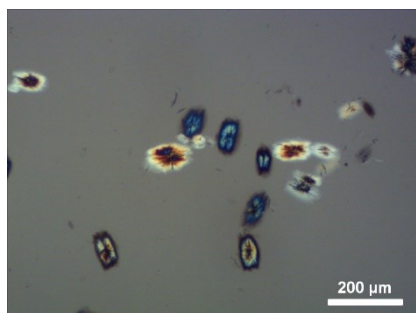

(a)

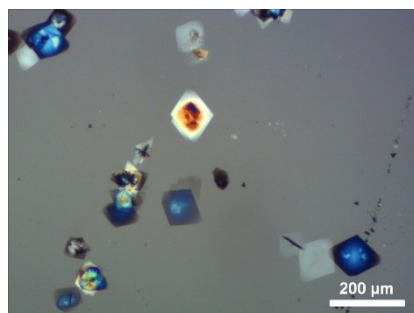

(b)

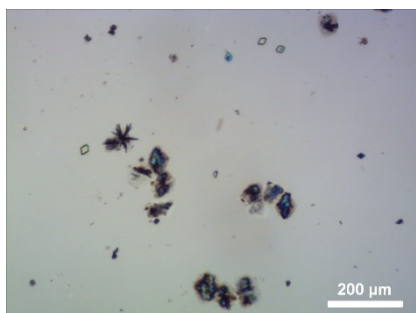

(c)

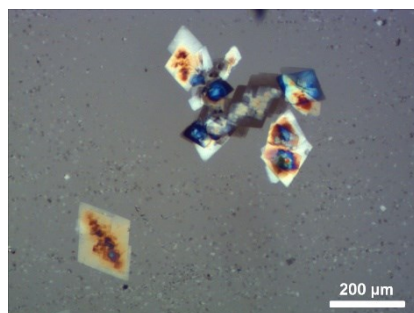

(d)

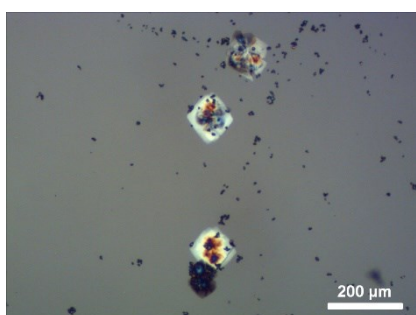

(e)

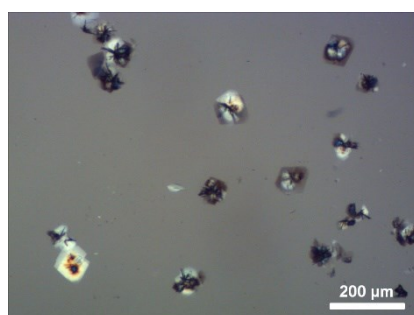

(f)

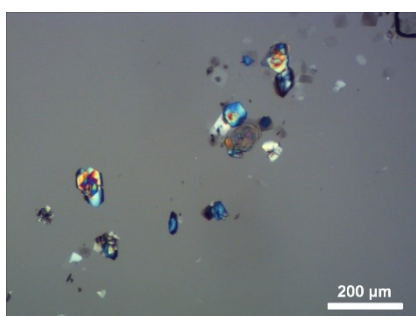

(g)

**Figure S4.** OM images of *L*-GLU crystals obtained by antisolvent addition using (a) THF, (b) acetone, (c) 1,4-dioxane, (d) IPA, (e) acetonitrile, (f) ethanol, and (g) methanol.

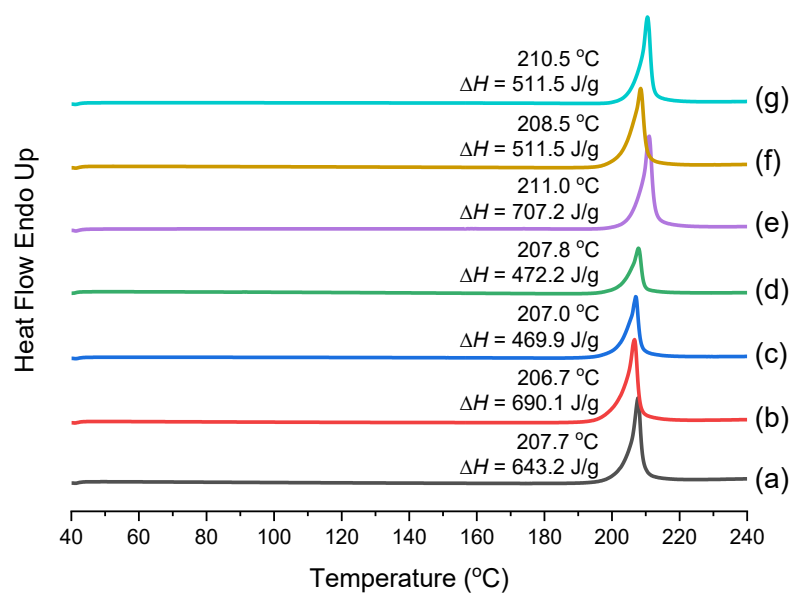

**Figure S5.** DSC scans of *L*-GLU crystals obtained by antisolvent addition using (a) THF, (b) acetone, (c) 1,4-dioxane, (d) IPA, (e) acetonitrile, (f) ethanol, and (g) methanol.

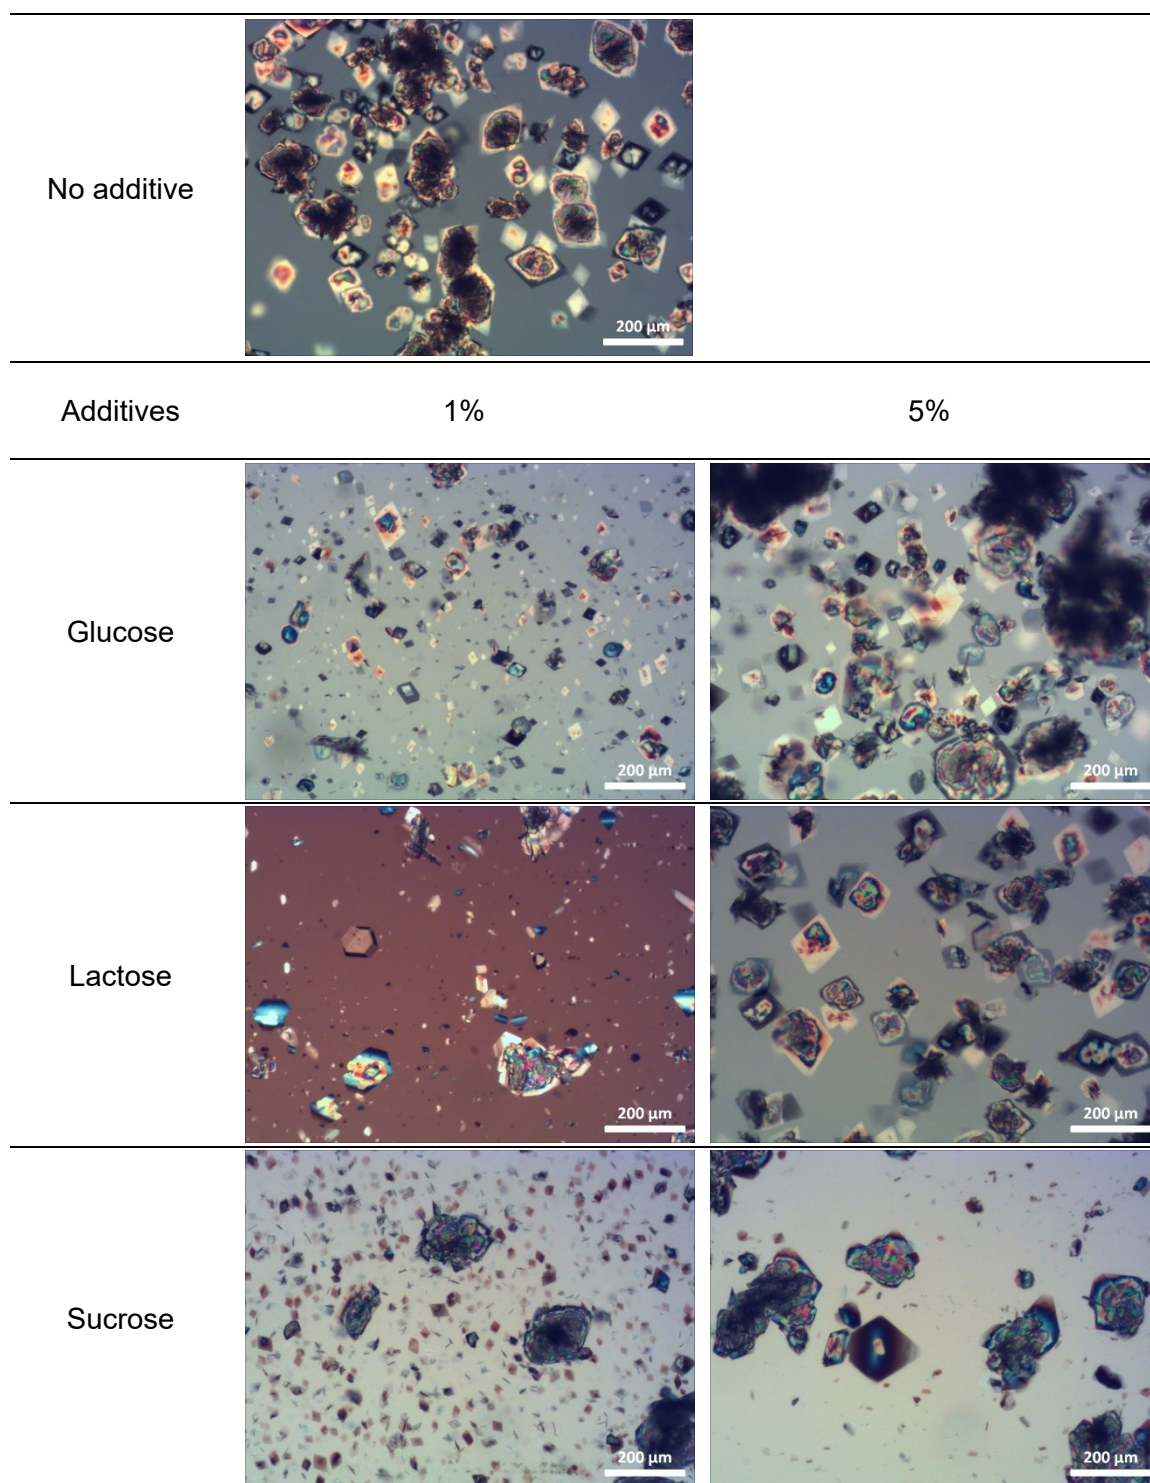

**Figure S6.** OM images of *L*-GLU crystals obtained by reactive crystallization in the absence and presence of glucose, lactose, and sucrose as additives.

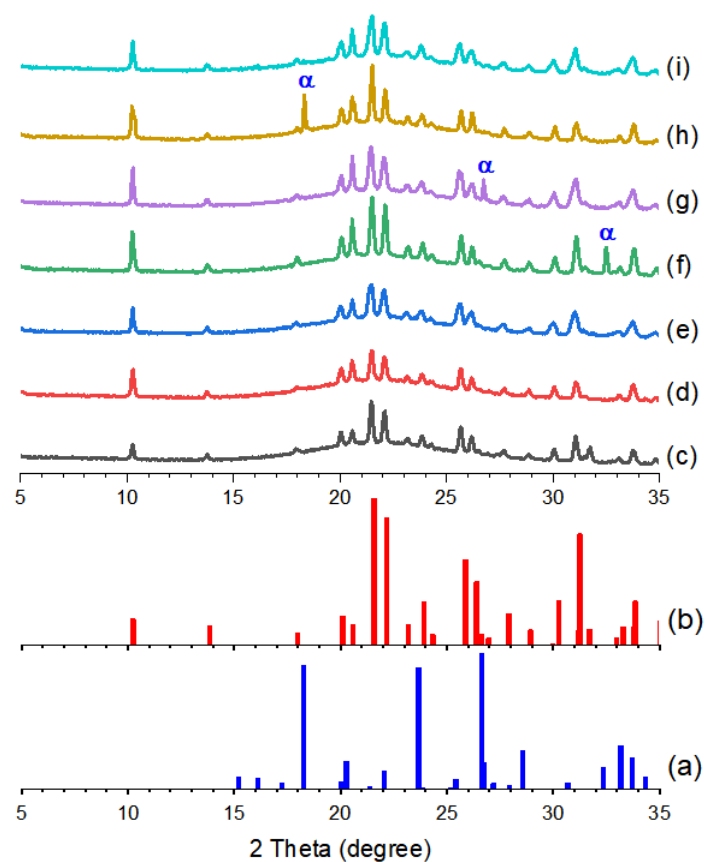

**Figure S7.** Theoretical patterns of (a)  $\alpha$ -GLU and (b)  $\beta$ -GLU acquired from CCDC with CCDC codes: LGLUAC02 and LGLUAC01, respectively. PXRD patterns of *L*-GLU crystals obtained by reactive crystallization (c) in the absence and presence of (d) 1% and (e) 5% glucose, (f) 1% and (g) 5% lactose, and (h) 1% and (i) 5% sucrose.

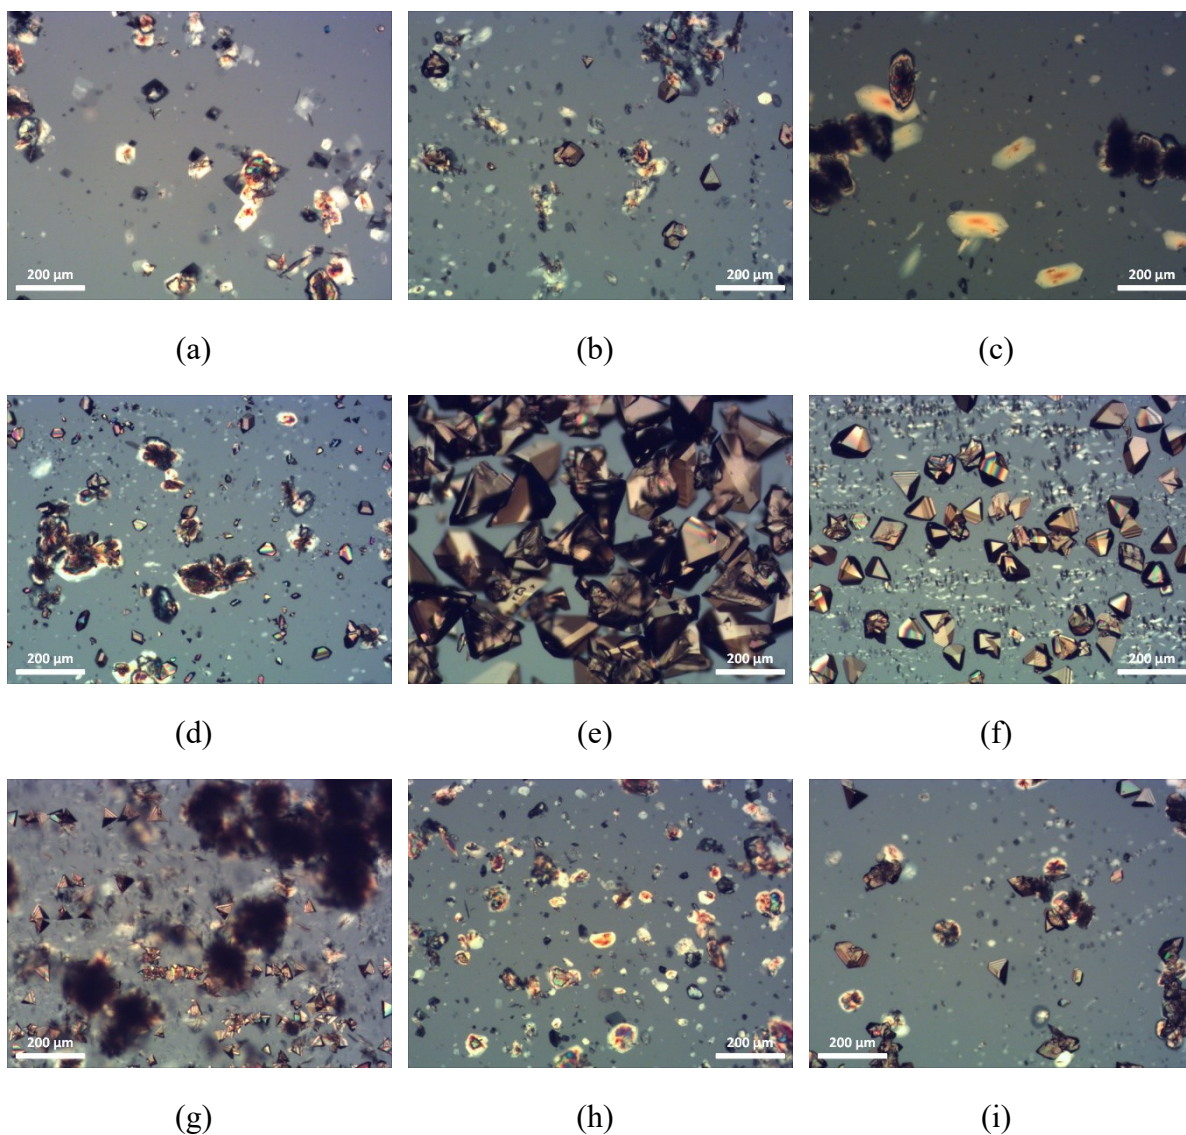

**Figure S8.** OM images of *L*-GLU crystals obtained by reactive crystallization in the presence of (a) glycine, (b) *L*-alanine, (c) *L*-valine, (d) *L*-proline, (e) *L*-leucine, (f) *L*-phenylalanine, (g) *L*-arginine, (h) *L*-serine, and (i) *L*-aspartic acid as additives.

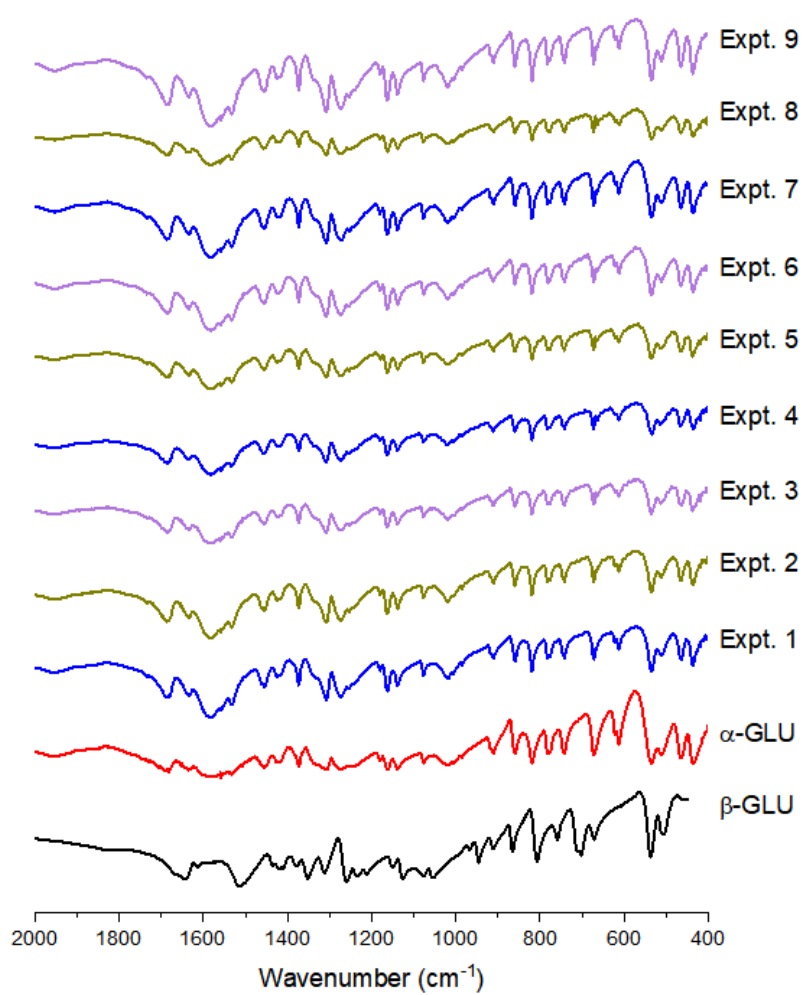

**Figure S9.** FTIR spectra of *L*-GLU crystals obtained by *L*-PHE-assisted reactive crystallization in the Taguchi's method (i.e., Expt. 1 to 9).

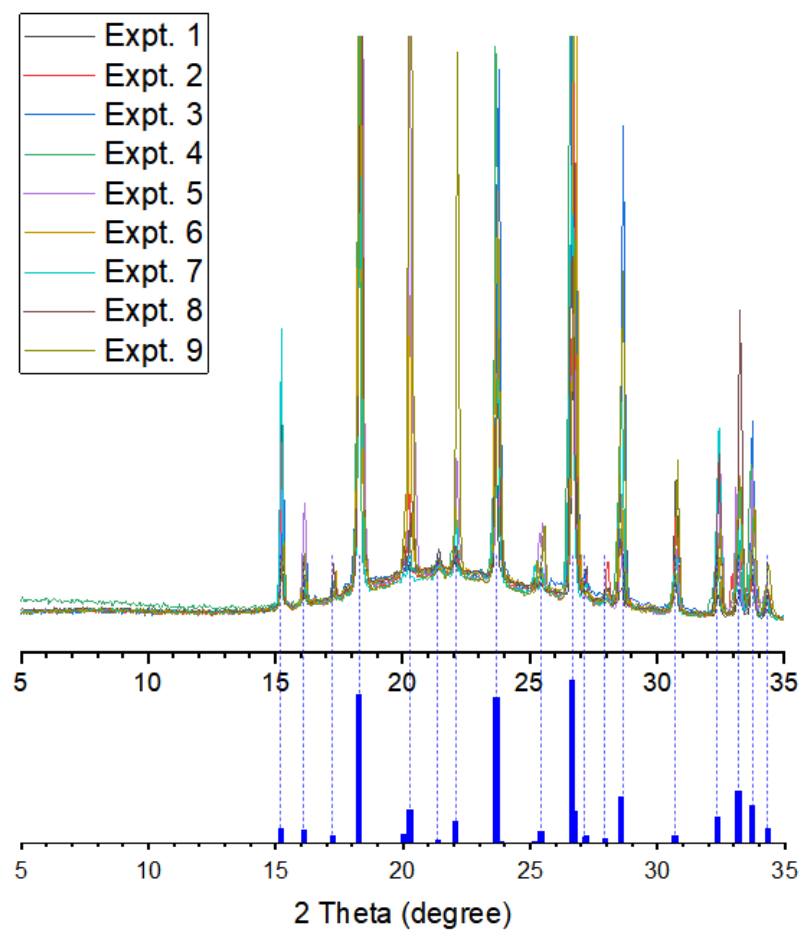

**Figure S10.** Overlapped PXRD spectra of *L*-GLU crystals by *L*-PHE-assisted reactive crystallization in the Taguchi's method (i.e., Expt. 1 to 9). All of them are in good agreement with the theoretical pattern of  $\alpha$ -GLU in the blue column (bottom).

**Table S2.** Response table for S/N ratios with respect to the mean particle size of  $\alpha$ -GLU.

| Level | Addition rate of<br>H <sub>2</sub> SO <sub>4</sub> (aq) | Reaction<br>temperature | Agitation rate | Concentration<br>of L-PHE |
|-------|---------------------------------------------------------|-------------------------|----------------|---------------------------|
| 1     | 28.55                                                   | 36.11                   | 23.54          | 31.94                     |
| 2     | 24.69                                                   | 28.15                   | 32.84          | 26.78                     |
| 3     | 30.01                                                   | 19.00                   | 26.88          | 24.54                     |
| Delta | 5.31                                                    | 17.09                   | 9.28           | 7.40                      |
| Rank  | 4                                                       | 1                       | 2              | 3                         |

**Table S3.** Response table for S/N ratios with respect to the PSD of  $\alpha$ -GLU.

| Level | Addition rate of<br>H <sub>2</sub> SO <sub>4</sub> (aq) | Reaction<br>temperature | Agitation rate | Concentration<br>of L-PHE |
|-------|---------------------------------------------------------|-------------------------|----------------|---------------------------|
| 1     | -42.93                                                  | -41.17                  | -43.97         | -43.61                    |
| 2     | -41.13                                                  | -41.39                  | -40.90         | -42.23                    |
| 3     | -42.00                                                  | -43.49                  | -41.19         | -40.21                    |
| Delta | 1.80                                                    | 2.32                    | 3.07           | 3.40                      |
| Rank  | 4                                                       | 3                       | 2              | 1                         |

**Table S4.** Response table for means with respect to the mean particle size of  $\alpha$ -GLU.

| Level | Addition rate of<br>H <sub>2</sub> SO <sub>4</sub> (aq) | Reaction<br>temperature | Agitation rate | Concentration<br>of L-PHE |
|-------|---------------------------------------------------------|-------------------------|----------------|---------------------------|
| 1     | 167.8                                                   | 123.9                   | 204.8          | 193.8                     |
| 2     | 158.7                                                   | 158.0                   | 152.6          | 170.9                     |
| 3     | 182.4                                                   | 227.0                   | 151.4          | 144.1                     |
| Delta | 23.7                                                    | 103.1                   | 53.3           | 49.7                      |
| Rank  | 4                                                       | 1                       | 2              | 3                         |

**Table S5.** Response table for means with respect to the PSD of  $\alpha$ -GLU.

| Level | Addition rate of<br>H <sub>2</sub> SO <sub>4</sub> (aq) | Reaction<br>temperature | Agitation rate | Concentration<br>of L-PHE |
|-------|---------------------------------------------------------|-------------------------|----------------|---------------------------|
| 1     | 139.7                                                   | 113.7                   | 154.3          | 149.3                     |
| 2     | 118.5                                                   | 120.9                   | 114.7          | 129.2                     |
| 3     | 125.2                                                   | 148.8                   | 114.5          | 104.8                     |
| Delta | 21.2                                                    | 35.1                    | 39.8           | 44.5                      |
| Rank  | 4                                                       | 3                       | 2              | 1                         |
